# Supplementary material for: Profiling of spatial metabolite distributions in wheat leaves under normal and nitrate limiting conditions
Source: PubMed Central journal article supplement (PMC4518043; doi:10.1016/j.phytochem.2015.01.007), 2015-07

Figure S1

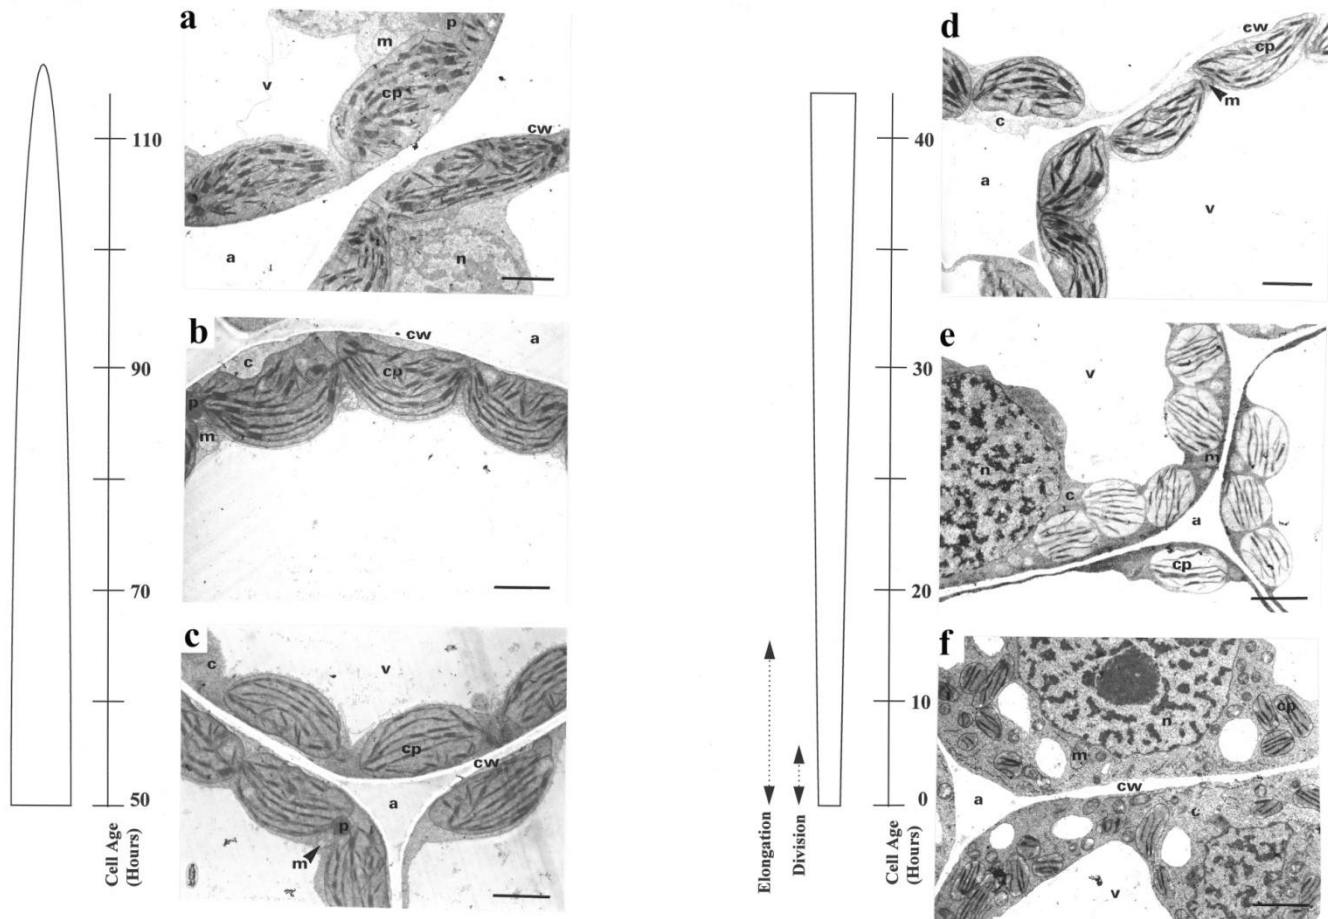

Supplement: mmc1.pdf [file mmc1.pdf]
