# Supplementary material for: Profiling of spatial metabolite distributions in wheat leaves under normal and nitrate limiting conditions
Source: PubMed Central journal article supplement (PMC4518043; doi:10.1016/j.phytochem.2015.01.007), 2015-07

Figure S3

(a) Leaf tip metabolites elevated in contrast to leaf base under nitrate- condition.  $-\log_2(\text{Base N-}/\text{Tip N-})$

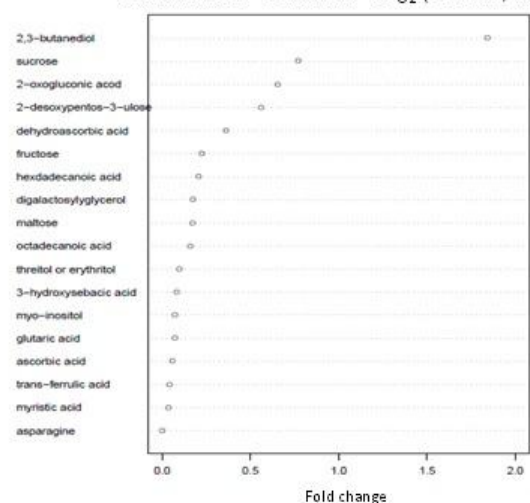

(b) Leaf base metabolites elevated in contrast to leaf tip under nitrate- condition.  $\log_2(\text{Base N-}/\text{Tip N-})$

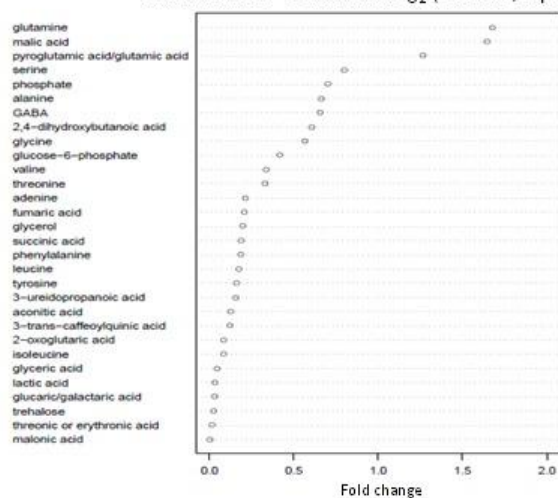

(c) Leaf tip metabolites elevated in contrast to leaf base under nitrate+ condition.  $-\log_2(\text{Base N+}/\text{Tip N+})$

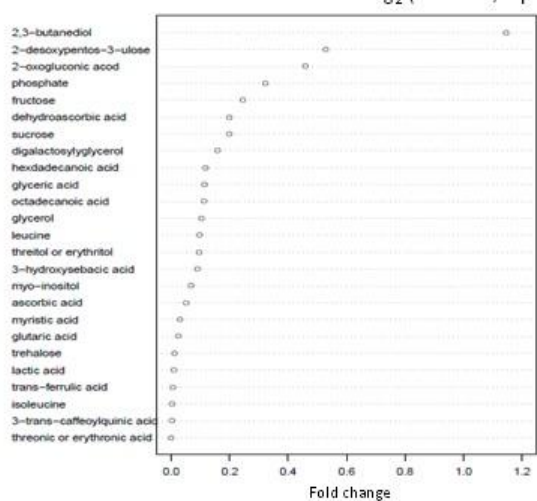

(d) Leaf base metabolites elevated in contrast to leaf tip under nitrate+ condition.  $\log_2(\text{Base N+}/\text{Tip N+})$

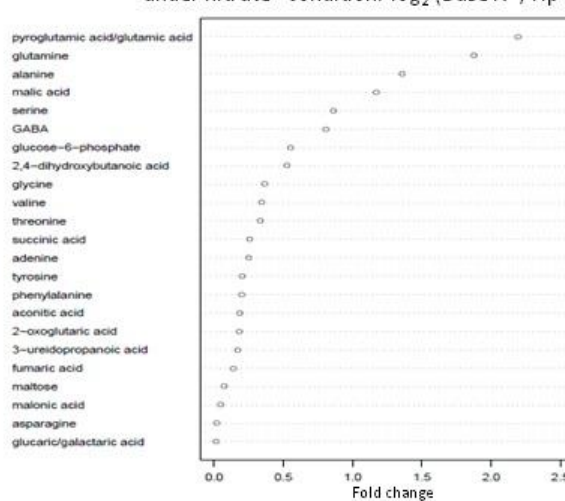

(e) Leaf tip metabolites elevated under nitrate+ condition. Tip  $-\log_2(\text{N-}/\text{N+})$

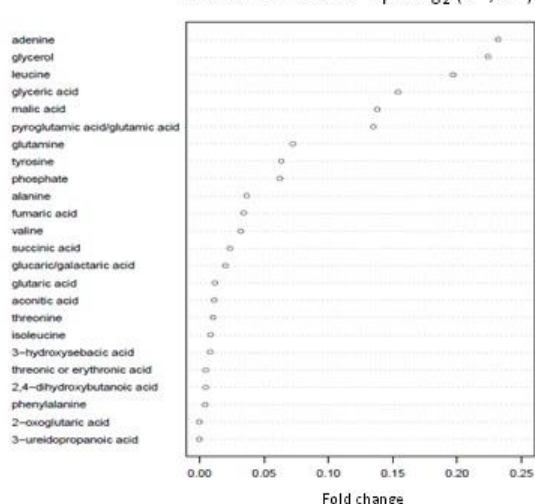

(f) Leaf tip metabolites elevated under nitrate- condition. Tip  $\log_2(\text{N-}/\text{N+})$

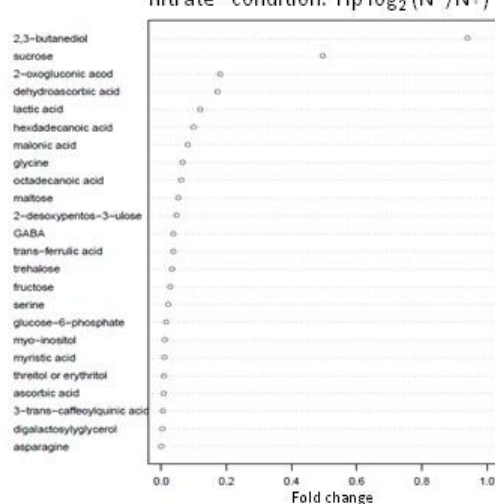

(g) Leaf base metabolites elevated under nitrate+ condition. Base  $-\log_2(\text{N-}/\text{N+})$

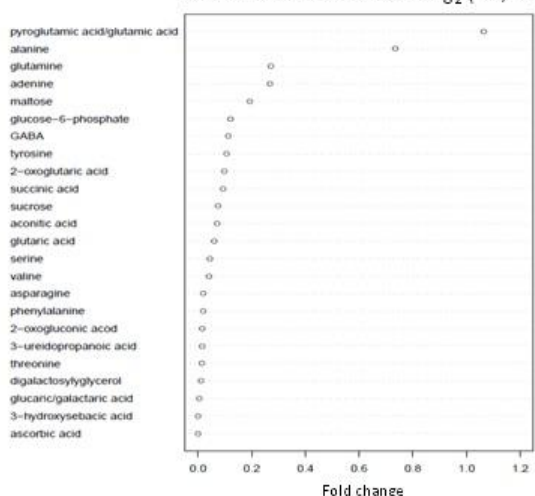

(h) Leaf base metabolites elevated under nitrate- condition. Base  $\log_2(\text{N-}/\text{N+})$

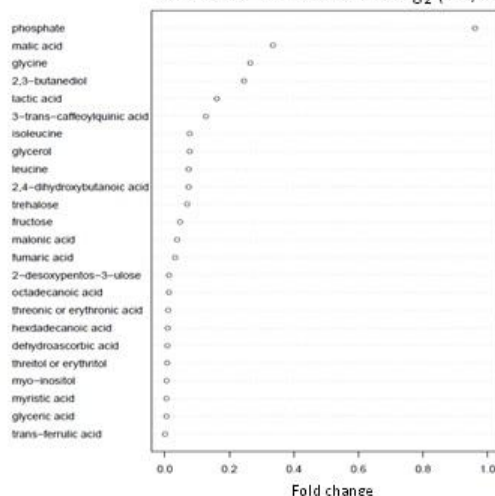

Supplement: mmc3.pdf [file mmc3.pdf]
